# Supplementary material for: A Community-Based Physical Activity Counselling Program for People With Knee Osteoarthritis: Feasibility and Preliminary Efficacy of the Track-OA Study
Source: PubMed Central journal article supplement (PMC5504340; doi:10.2196/mhealth.7863), 2017-06-26
Supplement: mhealth_v5i6e86_app1.pdf [file mhealth_v5i6e86_app1.pdf]

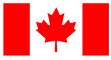

# Arthritis by Physical Activity

---

Note: This data cube displays pre-calculated statistics. Only one selection must be made for each level.

## Results

| Percentage        |                            | Physically inactive |
|-------------------|----------------------------|---------------------|
| Without arthritis | Percentage                 | 45.6                |
|                   | Lower 95% confidence limit | 45.1                |
|                   | Upper 95% confidence limit | 46.2                |
| With arthritis    | Percentage                 | 57.2                |
|                   | Lower 95% confidence limit | 56.0                |
|                   | Upper 95% confidence limit | 58.4                |

Date modified:  
2016-09-16
